# Supplementary material for: Simulation of long-term impact of intravitreal anti-VEGF therapy on patients with severe non-proliferative diabetic retinopathy
Source: HighWire-hosted journal article supplement (doi:10.1136/bmjophth-2022-001190), 2023-03-01
Supplement: bmjophth-2022-001190supp001_data_supplement.pdf [file bmjophth-2022-001190supp001_data_supplement.pdf]

## Online-only material

|                                                                                                                                                                                                                                                                                                           |    |
|-----------------------------------------------------------------------------------------------------------------------------------------------------------------------------------------------------------------------------------------------------------------------------------------------------------|----|
| Online-only material .....                                                                                                                                                                                                                                                                                | 1  |
| eMethods .....                                                                                                                                                                                                                                                                                            | 2  |
| Estimation of Sampling Weights for Bootstrap Sampling .....                                                                                                                                                                                                                                               | 2  |
| Cox Model Specification .....                                                                                                                                                                                                                                                                             | 2  |
| eReferences .....                                                                                                                                                                                                                                                                                         | 3  |
| eTable 1. Selection Criteria for the Real-World Cohort .....                                                                                                                                                                                                                                              | 6  |
| eTable 2. Diagnosis Codes Used to Identify Patients With NPDR From the IBM Explorys™ Database .....                                                                                                                                                                                                       | 7  |
| eTable 3. Diagnosis Codes Used for Identifying All Other Complications From the IBM Explorys™ Database .....                                                                                                                                                                                              | 12 |
| eTable 4. Diagnosis Codes Used for Identification of PDR and PDR-Related Events From the IBM Explorys™ Database .....                                                                                                                                                                                     | 20 |
| eTable 5. Effect of Anti-VEGF Therapies on Progression to PDR in Patients With DRSS of 47 and 53 and Moderately Severe or Severe NPDR Over a Period of 12 Months .....                                                                                                                                    | 23 |
| eTable 6. Baseline Factors Associated With PDR Progression Estimated Using a Cox Proportional Hazards Model .....                                                                                                                                                                                         | 24 |
| eTable 7. Baseline Demographic and Disease Characteristics .....                                                                                                                                                                                                                                          | 26 |
| eTable 8. Absolute Risk Reduction in PDR Events Over 5 Years Based on Anti-VEGF Treatment Scenario .....                                                                                                                                                                                                  | 28 |
| eFigure 1. Selection of Treatment-Naive Patients With NPDR From the IBM Explorys™ Database .....                                                                                                                                                                                                          | 30 |
| eFigure 2. (A) Five-Year Cumulative Rate of Disease Progression in Untreated Patients From the Real-World Cohort and (B) Impact of Intravitreal Aflibercept on the Rate of Disease Progression in Patients With Moderate to Severe NPDR From the PANORAMA Trial Projected Over 5 Years <sup>a</sup> ..... | 31 |
| eFigure 3. Treatment Effect Variability on the Risk of PDR Progression Among Patients With Severe NPDR .....                                                                                                                                                                                              | 32 |
| eFigure 4. Impact of Early Versus Delayed Anti-VEGF Treatment on the Estimated Incidence of Blindness <sup>a</sup> Over a 10-Year Period .....                                                                                                                                                            | 33 |

## eMethods

### Unspecified Index NPDR Diagnoses

NPDR diagnosis was determined based on SNOMED (Systematized Nomenclature of Medicine) codes. Unspecified index NPDR diagnoses using SNOMED codes were updated if there was an International Classification of Diseases (ICD) code indicating a specific diagnosis (mild/moderate/severe), or if a patient had a specific SNOMED or ICD diagnosis within 30 days of the index date. If a patient received a second mild NPDR diagnosis, the index diagnosis was updated to mild. Diagnosis codes were used to identify different stages of DR (eTable 2), all other ocular complications (eTable 3), and PDR and PDR-related events during follow-up (eTable 4).

### Simulation Model

Patients' annual risks could vary over the 5-year model horizon if they were impacted by changes in their age group and/or severity of NPDR. Patients' age groups were updated if they aged beyond the group cut off (ages were grouped in 35-44, 45-54, etc). NPDR stage was updated based on the risk of disease progression in the study cohort. Patients in the model had competing risks of NPDR stage progression and PDR progression, which could occur at any NPDR stage and was more likely the more severe the NPDR stage. In the simulation, the risk of PDR progression was adjusted accordingly for patients who improved (ie, reverted to moderate NPDR) following anti-VEGF treatment. Although reduced, these patients were still at a risk of NPDR and PDR progression through the end of the model horizon.

The simulation model leveraged stochasticity, including the random selection of patients from the cohort, the patient-specific response to stage progression, and the uncertain time until a PDR event. Stochasticity was fixed between untreated and treated scenarios, so that the simulated cohorts and their progression through NPDR stages were identical up until the point they reach severe NPDR stage.

### Estimation of Sampling Weights for Bootstrap Sampling

Sampling weights were utilized in the bootstrap sampling methodology to account for quantifiable differences in the characteristics of the real-world cohort relative to IBM MarketScan, and to allow for findings that were more representative of the overall US population. These weights were calculated by first segmenting patients from the real-world cohort into distinct groups (or strata) based on age, sex, non-proliferative diabetic retinopathy (NPDR) stage, and diabetic macular edema (DME) status. Discrete scaling factors were then determined for each of these strata based on the 2018 US NPDR prevalence obtained using IBM MarketScan.

### Risk of Progression to PDR

Variability of the risk of progression to PDR was estimated in the combined treatment scenario using the bootstrap method. Confidence intervals were estimated for the lower and upper limits of the treatment effect as reported in PANORAMA and RISE/RIDE,<sup>8,9</sup> and then were combined into 1 confidence interval. Calculations were based on 500 model iterations, with each iteration including 10,000 resampled observations from the simulated cohort. A margin of error was estimated to be within 1-5% points for all years of the simulation model. The combined treatment effect in this model was averaged by weighted US market shares of intravitreal aflibercept (39%) and intravitreal ranibizumab (61%) for DR without DME, estimated based on data provided by Vestrum Health (Naperville, Illinois).

### Cox Model Specification

A Cox proportional hazards model, adjusted for demographic and clinical characteristics, was used to estimate patient-specific composite proliferative diabetic retinopathy (PDR) risk and time to PDR event. The model was further calibrated to ensure the average patient risk predicted by the model corresponded with that of an average patient with NPDR in the real-world cohort. Calibration constants were estimated using Excel Solver optimization, which minimizes the error between average actual cohort PDR risk by NPDR stage and the average risk resulting from a manual calculation using Cox proportional hazards coefficients.

For this analysis, a PDR event was defined as any of the following diagnoses: PDR, vitreous hemorrhage, retinal detachment, or neovascularization.

The variables were selected using a backwards elimination process and evaluated for best fit within the regression model (i.e.,  $P < .1$ ). The reference patient in the mathematical model was a female with mild/unspecified NPDR, no comorbidities, and no DME. Because the reference patient did not correspond to an average patient in the cohort, the 1-year risk estimates from the Cox model were compared and calibrated to match with the average cohort risks obtained via Kaplan-Meier analysis.

The final Cox model included age, sex, diabetic nephropathy, hypertension, cerebrovascular accident, diabetic ulcer, amputation, calcium blocker use, beta blocker use, baseline NPDR severity, diabetes control regimen, dyslipidemia, glycated hemoglobin, and DME presence. This 1-year Cox model was used iteratively over the model time horizon of 5 years. During each year of the simulation, patients' age group, NPDR stage, and NPDR stage interaction with DME were updated to reflect aging, disease progression, or response to treatment. The patients' risk of progression from mild to moderate and moderate to severe NPDR stages was estimated. Untreated cohort progression risks were obtained by subtracting hazard rates of cohort progression to PDR for the 3 NPDR stages.

Patients' variable and baseline characteristics were fed into calculation of their annual risks and the estimation of time to PDR event in each year of the simulation model. For any iteration in which the resulting time to PDR event was  $< 1$  year, the patient was recorded to experience a PDR event that year; otherwise, the patient's risk was recalculated for each consecutive year until experiencing a PDR event or the end of the model horizon, whichever came first.

### eReferences

1. International Diabetes Federation. Clinical practice recommendations for managing diabetic macular edema. Accessed May 5, 2022. <https://www.idf.org/e-library/guidelines/161-dme-clinical-practice-recommendations.html>
2. American Academy of Ophthalmology. Diabetic retinopathy preferred practice pattern 2019. Accessed July 12, 2022. <https://www.aao.org/preferred-practice-pattern/diabetic-retinopathy-ppp>
3. Early Treatment Diabetic Retinopathy Study Research Group. Fluorescein angiographic risk factors for progression of diabetic retinopathy. Early Treatment Diabetic Retinopathy Study report number 13. *Ophthalmology*. May 1991;98(5 Suppl):834-40.

4. Solomon SD, Chew E, Duh EJ, et al. Diabetic retinopathy: a position statement by the American Diabetes Association. *Diabetes Care*. Mar 2017;40(3):412-418.  
doi:10.2337/dc16-2641
5. Early Treatment Diabetic Retinopathy Study Research Group. Fundus photographic risk factors for progression of diabetic retinopathy. ETDRS report number 12. *Ophthalmology*. May 1991;98(5 Suppl):823-33. doi:10.1016/S0161-6420(13)38014-2
6. Moshfeghi A, Garmo V, Sheinson D, Ghanekar A, Abbass I. Five-year patterns of diabetic retinopathy progression in US clinical practice. *Clin Ophthalmol*. 2020;14:3651-3659.
7. Wykoff CC, Khurana RN, Nguyen QD, et al. Risk of blindness among patients with diabetes and newly diagnosed diabetic retinopathy. *Diabetes Care*. Mar 2021;44(3):748-756.  
doi:10.2337/dc20-0413
8. Brown DM, Wykoff CC, Boyer D, et al. Evaluation of intravitreal aflibercept for the treatment of severe nonproliferative diabetic retinopathy: results from the PANORAMA randomized clinical trial. *JAMA Ophthalmol*. Aug 5 2021;139(9):946-955.  
doi:10.1001/jamaophthalmol.2021.2809
9. Wykoff CC, Eichenbaum DA, Roth DB, Hill L, Fung AE, Haskova Z. Ranibizumab induces regression of diabetic retinopathy in most patients at high risk of progression to proliferative diabetic retinopathy. *Ophthalmol Retina*. Oct 2018;2(10):997-1009.  
doi:10.1016/j.oret.2018.06.005
10. Maturi RK, Glassman AR, Josic K, et al. Effect of intravitreal anti-vascular endothelial growth factor vs sham treatment for prevention of vision-threatening complications of diabetic retinopathy: the Protocol W randomized clinical trial. *JAMA Ophthalmol*. Mar 30 2021;139(7):701-712. doi:10.1001/jamaophthalmol.2021.0606
11. Press WHT, Saul A; Vetterling, William T; Flannery, Brian P. *Numerical Recipes: The Art of Scientific Computing*. Third ed. Cambridge University Press; 2007.

12. Diabetic Retinopathy Study Research Group. Preliminary report on effects of photocoagulation therapy. *Am J Ophthalmol.* 1976;81(4):383-396. doi:10.1016/0002-9394(76)90292-0
13. Orlando LA, Belasco EJ, Patel UD, Matchar DB. The chronic kidney disease model: a general purpose model of disease progression and treatment. *BMC Med Inform Decis Mak.* Jun 16 2011;11:41. doi:10.1186/1472-6947-11-41
14. Barhak J, Isaman DJ, Ye W, Lee D. Chronic disease modeling and simulation software. *J Biomed Inform.* Oct 2010;43(5):791-9. doi:10.1016/j.jbi.2010.06.003
15. Xie G. A novel Monte Carlo simulation procedure for modelling COVID-19 spread over time. *Sci Rep.* Aug 4 2020;10(1):13120. doi:10.1038/s41598-020-70091-1
16. Cannon CP, Khan I, Klimchak AC, Reynolds MR, Sanchez RJ, Sasiela WJ. Simulation of lipid-lowering therapy intensification in a population with atherosclerotic cardiovascular disease. *JAMA Cardiol.* Sep 1 2017;2(9):959-966. doi:10.1001/jamacardio.2017.2289

**eTable 1. Selection Criteria for the Real-World Cohort**

| Inclusion Criteria                                                                                                                                                                                                                                                                                                                                                                                                                                                                                                                                                                 | Exclusion Criteria                                                                                                                                                                                                                                                                                     |
|------------------------------------------------------------------------------------------------------------------------------------------------------------------------------------------------------------------------------------------------------------------------------------------------------------------------------------------------------------------------------------------------------------------------------------------------------------------------------------------------------------------------------------------------------------------------------------|--------------------------------------------------------------------------------------------------------------------------------------------------------------------------------------------------------------------------------------------------------------------------------------------------------|
| <p>Patients aged <math>\geq 18</math> years diagnosed with NPDR at any stage (mild/unspecified, moderate, or severe) with or without DME and with a first-time diagnosis (SNOMED coded) between 2011 and 2017</p>                                                                                                                                                                                                                                                                                                                                                                  | <p>Patients aged <math>&lt; 18</math> years who had received treatment (anti-VEGF, PRP laser, and steroid medications), accompanied with PDR, RD, NV, VH, RVD, or RVO in the baseline period or developed PDR, RD, NV, or VH within 1 week of NPDR diagnosis</p>                                       |
| <p>Patients continuously enrolled <math>\geq 1</math> year before the study period. Patient enrollment continuity was approximated using the first and last observed date for patient ID across all encounter tables in the database (drug, hospital admissions, medical history, health maintenance, procedures, problem list, etc.)</p>                                                                                                                                                                                                                                          | <p>Patients with outlier values in lab measurements (HbA1c <math>&gt; 13.5\%</math>, LDL-C <math>&gt; 1000</math> mg/dL, HDL-C <math>&gt; 90</math> mg/dL, triglycerides <math>&gt; 2000</math> mg/dL) and negative follow-up (referred to when index diagnosis was after the last follow-up date)</p> |
| <p>Patients were included if an unspecified SNOMED NPDR diagnosis was updated, if they also had an ICD code indicating a specific diagnosis (mild/moderate/severe), or if they had a specific SNOMED or ICD diagnosis within 30 days of the index date. If the patient's second diagnosis was mild NPDR, index diagnosis was updated to mild</p>                                                                                                                                                                                                                                   |                                                                                                                                                                                                                                                                                                        |
| <p>Abbreviations: DME, diabetic macular edema; HbA1c, glycated hemoglobin A1c; HDL-C, high-density lipoprotein cholesterol; ICD, International Classification of Diseases; LDL-C, low-density lipoprotein cholesterol; NPDR, non-proliferative diabetic retinopathy; NV, neovascularization; PDR, proliferative diabetic retinopathy; PRP, pan-retinal photocoagulation; RD, retinal detachment; RVD, retinal vascular disease; RVO, retinal vein occlusion; SNOMED, Systematized Nomenclature of Medicine; VEGF, vascular endothelial growth factor; VH, vitreous hemorrhage.</p> |                                                                                                                                                                                                                                                                                                        |

**eTable 2. Diagnosis Codes Used to Identify Patients With NPDR From the IBM Explorys™ Database**

| <b>SNOMED ID</b> | <b>Description</b>                                                                                                     | <b>Clinical Classification</b> |
|------------------|------------------------------------------------------------------------------------------------------------------------|--------------------------------|
| 4855003          | Retinopathy due to diabetes mellitus                                                                                   | Unspecified DR                 |
| 311782002        | Advanced retinal disease due to diabetes mellitus (disorder)                                                           | Unspecified DR                 |
| 232020009        | Disorder of macula due to diabetes mellitus (disorder)                                                                 | Unspecified DR                 |
| 193350004        | Advanced maculopathy due to diabetes mellitus (disorder)                                                               | Unspecified DR                 |
| 769245002        | Disorder of left macula due to diabetes mellitus (disorder)                                                            | Unspecified DR                 |
| 769218003        | Macular edema of left eye due to diabetes mellitus (disorder)                                                          | DME                            |
| 769222008        | Clinically significant macular edema of left eye due to diabetes mellitus (disorder)                                   | DME                            |
| 769244003        | Disorder of right macula due to diabetes mellitus (disorder)                                                           | Unspecified DR                 |
| 769217008        | Macular edema of right eye due to diabetes mellitus (disorder)                                                         | DME                            |
| 769221001        | Clinically significant macular edema of right eye due to diabetes mellitus (disorder)                                  | DME                            |
| 314014002        | Ischemic maculopathy due to diabetes mellitus (disorder)                                                               | Unspecified DR                 |
| 314015001        | Mixed maculopathy due to diabetes mellitus (disorder)                                                                  | Unspecified DR                 |
| 312912001        | Macular edema due to diabetes mellitus (disorder)                                                                      | DME                            |
| 770097006        | Clinically significant macular edema due to diabetes mellitus (disorder)                                               | DME                            |
| 399872003        | Severe nonproliferative retinopathy with clinically significant macular edema due to diabetes mellitus (disorder)      | Severe NPDR with DME           |
| 399877009        | Very severe nonproliferative retinopathy with clinically significant macular edema due to diabetes mellitus (disorder) | Severe NPDR with DME           |
| 314010006        | Diffuse exudative maculopathy due to diabetes mellitus (disorder)                                                      | Unspecified DR                 |
| 314011005        | Focal exudative maculopathy due to diabetes mellitus (disorder)                                                        | DME                            |
| 399874002        | High risk proliferative retinopathy with clinically significant macula edema due to diabetes mellitus (disorder)       | PDR with DME                   |
| 769219006        | Macular edema due to type 1 diabetes mellitus (disorder)                                                               | DME                            |
| 420486006        | Exudative maculopathy due to type 1 diabetes mellitus (disorder)                                                       | DME                            |
| 769220000        | Macular edema due to type 2 diabetes mellitus (disorder)                                                               | DME                            |
| 421779007        | Exudative maculopathy due to type 2 diabetes mellitus (disorder)                                                       | DME                            |
| 399864000        | Macular edema not clinically significant due to diabetes mellitus (disorder)                                           | DME                            |
| 314015001        | Mixed maculopathy due to diabetes mellitus (disorder)                                                                  | Unspecified DR                 |

|                 |                                                                                                                       |                |
|-----------------|-----------------------------------------------------------------------------------------------------------------------|----------------|
| 399875001       | Non-high-risk proliferative retinopathy with clinically significant macular edema due to diabetes mellitus (disorder) | PDR with DME   |
| 399868002       | Intraretinal microvascular anomaly due to diabetes mellitus (disorder)                                                | Unspecified DR |
| 770324004       | Ischemia of retina due to diabetes mellitus (disorder)                                                                | Unspecified DR |
| 104941000119109 | Ischemia of retina due to type 1 diabetes mellitus (disorder)                                                         | Unspecified DR |
| 104961000119108 | Ischemia of retina due to type 2 diabetes mellitus (disorder)                                                         | Unspecified DR |
| 25412000        | Microaneurysm of retinal artery due to diabetes mellitus (disorder)                                                   | Unspecified DR |
| 770582001       | Microaneurysm of left retinal artery due to diabetes mellitus (disorder)                                              | Unspecified DR |
| 770581008       | Microaneurysm of right retinal artery due to diabetes mellitus (disorder)                                             | Unspecified DR |
| 390834004       | Nonproliferative retinopathy due to diabetes mellitus                                                                 | NPDR           |
| 312903003       | Mild nonproliferative retinopathy due to diabetes mellitus (disorder)                                                 | Mild NPDR      |
| 368711000119106 | Mild nonproliferative retinopathy due to secondary diabetes mellitus                                                  | Mild NPDR      |
| 138881000119106 | Mild nonproliferative retinopathy due to type 1 diabetes mellitus (disorder)                                          | Mild NPDR      |
| 138911000119106 | Mild nonproliferative retinopathy due to type 2 diabetes mellitus (disorder)                                          | Mild NPDR      |
| 769184004       | Mild nonproliferative retinopathy of left eye due to diabetes mellitus (disorder)                                     | Mild NPDR      |
| 769183005       | Mild nonproliferative retinopathy of right eye due to diabetes mellitus (disorder)                                    | Mild NPDR      |
| 312904009       | Moderate nonproliferative retinopathy due to diabetes mellitus (disorder)                                             | Moderate NPDR  |
| 368741000119105 | Moderate non-proliferative retinopathy due to secondary diabetes mellitus (disorder)                                  | Moderate NPDR  |
| 138891000119109 | Moderate nonproliferative retinopathy due to type 1 diabetes mellitus (disorder)                                      | Moderate NPDR  |
| 138921000119104 | Moderate nonproliferative retinopathy due to type 2 diabetes mellitus (disorder)                                      | Moderate NPDR  |
| 769186002       | Moderate nonproliferative retinopathy of left eye due to diabetes mellitus (disorder)                                 | Moderate NPDR  |
| 769185003       | Moderate nonproliferative retinopathy of right eye due to diabetes mellitus (disorder)                                | Moderate NPDR  |
| 368721000119104 | Non-proliferative retinopathy due to secondary diabetes mellitus (disorder)                                           | NPDR           |
| 368711000119106 | Mild nonproliferative retinopathy due to secondary diabetes mellitus (disorder)                                       | Mild NPDR      |
| 60961000119107  | Nonproliferative diabetic retinopathy due to type 1 diabetes mellitus (disorder)                                      | NPDR           |
| 138881000119106 | Mild nonproliferative retinopathy due to type 1 diabetes mellitus (disorder)                                          | Mild NPDR      |
| 1551000119108   | Nonproliferative retinopathy due to type 2 diabetes mellitus (disorder)                                               | NPDR           |
| 138911000119106 | Mild nonproliferative retinopathy due to type 2 diabetes mellitus (disorder)                                          | Mild NPDR      |
| 816177009       | Nonproliferative retinopathy of left eye due to diabetes mellitus (disorder)                                          | NPDR           |
| 408410002       | On examination - left eye background diabetic retinopathy (disorder)                                                  | NPDR           |
| 408412005       | On examination - left eye preproliferative diabetic retinopathy (disorder)                                            | Severe NPDR    |
| 769182000       | Preproliferative retinopathy of left eye due to diabetes mellitus (disorder)                                          | Severe NPDR    |



|                 |                                                                                                                        |                         |
|-----------------|------------------------------------------------------------------------------------------------------------------------|-------------------------|
| 769188001       | Severe nonproliferative retinopathy of left eye due to diabetes mellitus (disorder)                                    | Severe NPDR             |
| 769191001       | Very severe nonproliferative retinopathy of left eye due to diabetes mellitus (disorder)                               | Severe NPDR             |
| 816178004       | Nonproliferative retinopathy of right eye due to diabetes mellitus (disorder)                                          | NPDR                    |
| 408409007       | On examination - right eye background diabetic retinopathy (disorder)                                                  | NPDR                    |
| 408411003       | On examination - right eye preproliferative diabetic retinopathy (disorder)                                            | Severe NPDR             |
| 769181007       | Preproliferative retinopathy of right eye due to diabetes mellitus (disorder)                                          | Severe NPDR             |
| 769187006       | Severe nonproliferative retinopathy of right eye due to diabetes mellitus (disorder)                                   | Severe NPDR             |
| 769190000       | Very severe nonproliferative retinopathy of right eye due to diabetes mellitus (disorder)                              | Severe NPDR             |
| 193349004       | Preproliferative retinopathy due to diabetes mellitus (disorder)                                                       | Severe NPDR             |
| 312905005       | Severe nonproliferative retinopathy due to diabetes mellitus (disorder)                                                | Severe NPDR             |
| 399872003       | Severe nonproliferative retinopathy with clinically significant macular edema due to diabetes mellitus (disorder)      | Severe NPDR with DME    |
| 399873008       | Severe nonproliferative retinopathy without macular edema due to diabetes mellitus (disorder)                          | Severe NPDR without DME |
| 399876000       | Very severe nonproliferative retinopathy due to diabetes mellitus (disorder)                                           | Severe NPDR             |
| 399877009       | Very severe nonproliferative retinopathy with clinically significant macular edema due to diabetes mellitus (disorder) | Severe NPDR with DME    |
| 399863006       | Very severe nonproliferative retinopathy without macular edema due to diabetes mellitus (disorder)                     | Severe NPDR without DME |
| 59276001        | Proliferative retinopathy due to diabetes mellitus (disorder)                                                          | PDR                     |
| 312907002       | High risk proliferative retinopathy due to diabetes mellitus (disorder)                                                | PDR                     |
| 399869005       | High risk proliferative retinopathy not amenable to photocoagulation due to diabetes mellitus (disorder)               | PDR                     |
| 399862001       | High risk proliferative retinopathy without macular edema due to diabetes mellitus (disorder)                          | PDR without DME         |
| 399865004       | Very severe proliferative retinopathy due to diabetes mellitus (disorder)                                              | PDR                     |
| 312906006       | Non-high-risk proliferative retinopathy due to diabetes mellitus (disorder)                                            | PDR                     |
| 399870006       | Non-high-risk proliferative retinopathy with no macular edema due to diabetes mellitus (disorder)                      | PDR without DME         |
| 312908007       | Quiescent proliferative retinopathy due to diabetes mellitus (disorder)                                                | PDR                     |
| 60971000119101  | Proliferative retinopathy due to type 1 diabetes mellitus (disorder)                                                   | PDR                     |
| 1501000119109   | Proliferative retinopathy due to type 2 diabetes mellitus (disorder)                                                   | PDR                     |
| 97341000119105  | Proliferative retinopathy with retinal edema due to type 2 diabetes mellitus (disorder)                                | PDR with DME            |
| 770766000       | Proliferative retinopathy of left eye due to diabetes mellitus (disorder)                                              | PDR                     |
| 408414006       | On examination - left eye proliferative diabetic retinopathy (disorder)                                                | PDR                     |
| 414894003       | On examination - left eye stable treated proliferative diabetic retinopathy (disorder)                                 | PDR                     |
| 816962002       | Stable treated proliferative retinopathy of left eye due to diabetes mellitus (disorder)                               | PDR                     |
| 103981000119101 | Proliferative retinopathy following surgery due to diabetes mellitus (disorder)                                        | PDR                     |

|                 |                                                                                                                     |                                |
|-----------------|---------------------------------------------------------------------------------------------------------------------|--------------------------------|
| 770765001       | Proliferative retinopathy of right eye due to diabetes mellitus (disorder)                                          | PDR                            |
| 408413000       | On examination - right eye proliferative diabetic retinopathy (disorder)                                            | PDR                            |
| 414910007       | On examination - right eye stable treated proliferative diabetic retinopathy (disorder)                             | PDR                            |
| 816961009       | Stable treated proliferative retinopathy of right eye due to diabetes mellitus (disorder)                           | PDR                            |
| 312909004       | Proliferative retinopathy with iris neovascularization due to diabetes mellitus (disorder)                          | PDR with<br>neovascularization |
| 232022001       | Proliferative retinopathy with neovascularization elsewhere than the optic disc due to diabetes mellitus (disorder) | PDR with<br>neovascularization |
| 232021008       | Proliferative retinopathy with optic disc neovascularization due to diabetes mellitus (disorder)                    | PDR with<br>neovascularization |
| 770323005       | Retinal edema due to diabetes mellitus (disorder)                                                                   | Unspecified DR                 |
| 97331000119101  | Macular edema and retinopathy due to type 2 diabetes mellitus (disorder)                                            | Unspecified DR with DME        |
| 314537004       | Optic papillopathy due to diabetes mellitus (disorder)                                                              | Unspecified DR                 |
| 109171000119104 | Retinal edema due to type 1 diabetes mellitus (disorder)                                                            | Unspecified DR                 |
| 28331000119107  | Retinal edema due to type 2 diabetes mellitus (disorder)                                                            | Unspecified DR                 |
| 421779007       | Exudative maculopathy due to type 1 diabetes mellitus (disorder)                                                    | DME                            |
| 420789003       | Retinopathy due to type 1 diabetes mellitus (disorder)                                                              | Unspecified DR                 |
| 60961000119107  | Nonproliferative diabetic retinopathy due to type 1 diabetes mellitus (disorder)                                    | NPDR                           |
| 138891000119109 | Moderate nonproliferative retinopathy due to type 1 diabetes mellitus (disorder)                                    | Moderate NPDR                  |
| 60971000119101  | Proliferative diabetic retinopathy due to type 1 diabetes mellitus (disorder)                                       | PDR                            |
| 706894000       | Retinopathy due to unstable diabetes mellitus type 1 (disorder)                                                     | Unspecified DR                 |
| 82571000119107  | Traction detachment of retina due to type 1 diabetes mellitus (disorder)                                            | Retinal detachment             |
| 422034002       | Retinopathy due to type 2 diabetes mellitus (disorder)                                                              | Unspecified DR                 |
| 1551000119108   | Nonproliferative retinopathy due to type 2 diabetes mellitus (disorder)                                             | NPDR                           |
| 138911000119106 | Mild nonproliferative retinopathy due to type 2 diabetes mellitus (disorder)                                        | NPDR                           |
| 138921000119104 | Moderate nonproliferative retinopathy due to type 2 diabetes mellitus (disorder)                                    | Moderate NPDR                  |
| 1501000119109   | Proliferative retinopathy due to type 2 diabetes mellitus (disorder)                                                | PDR                            |
| 769220000       | Macular edema due to type 2 diabetes mellitus (disorder)                                                            | DME                            |
| 97341000119105  | Proliferative retinopathy with retinal edema due to type 2 diabetes mellitus (disorder)                             | PDR with DME                   |
| 82541000119100  | Traction detachment of retina due to type 2 diabetes mellitus (disorder)                                            | Retinal detachment             |
| 232023006       | Traction detachment of retina due to diabetes mellitus (disorder)                                                   | Retinal detachment             |
| 82571000119107  | Traction detachment of retina due to type 1 diabetes mellitus (disorder)                                            | Retinal detachment             |
| 82541000119100  | Traction detachment of retina due to type 2 diabetes mellitus (disorder)                                            | Retinal detachment             |

---

|           |                                                                      |                |
|-----------|----------------------------------------------------------------------|----------------|
| 399866003 | Venous beading of retina due to diabetes mellitus (disorder)         | Unspecified DR |
| 770600002 | Venous beading of left retina due to diabetes mellitus (disorder)    | Unspecified DR |
| 770599000 | Venous beading of right retina due to diabetes mellitus (disorder)   | Unspecified DR |
| 399871005 | Visually threatening retinopathy due to diabetes mellitus (disorder) | PDR            |
| 417677008 | On examination - sight threatening diabetic retinopathy (disorder)   | PDR            |

---

Abbreviations: DME, diabetic macular edema; DR, diabetic retinopathy; NPDR, non-proliferative diabetic retinopathy; PDR, proliferative diabetic retinopathy.

**eTable 3. Diagnosis Codes Used for Identifying All Other Complications From the IBM Explorys™ Database**

| SNOMED ID       | Description                                                                                | Clinical Classification |
|-----------------|--------------------------------------------------------------------------------------------|-------------------------|
| 51995000        | Iris neovascularization                                                                    | Neovascularization      |
| 713457002       | Neovascular glaucoma due to diabetes mellitus (disorder)                                   | Neovascularization      |
| 416328002       | On examination - left eye rubeosis iridis (disorder)                                       | Neovascularization      |
| 416650005       | On examination - right eye rubeosis iridis (disorder)                                      | Neovascularization      |
| 312909004       | Proliferative retinopathy with iris neovascularization due to diabetes mellitus (disorder) | Neovascularization      |
| 82581000119105  | Rubeosis iridis due to type 1 diabetes mellitus (disorder)                                 | Neovascularization      |
| 82551000119103  | Rubeosis iridis due to type 2 diabetes mellitus (disorder)                                 | Neovascularization      |
| 678201000119103 | Rubeosis iridis of left eye (disorder)                                                     | Neovascularization      |
| 678191000119101 | Rubeosis iridis of bilateral eyes (disorder)                                               | Neovascularization      |
| 678211000119100 | Rubeosis iridis of right eye (disorder)                                                    | Neovascularization      |
| 246925003       | Vascularization of cornea (finding)                                                        | Neovascularization      |
| 373431007       | Corneal ghost vessels (finding)                                                            | Neovascularization      |
| 35666006        | Corneal pannus (disorder)                                                                  | Neovascularization      |
| 341221000119109 | Corneal pannus of left eye (disorder)                                                      | Neovascularization      |
| 346471000119103 | Corneal pannus of bilateral eyes (disorder)                                                | Neovascularization      |
| 2102007         | Deep vascularization of cornea (disorder)                                                  | Neovascularization      |
| 4873000         | Localized vascularization of cornea (disorder)                                             | Neovascularization      |
| 341231000119107 | Neovascularization of left cornea (disorder)                                               | Neovascularization      |
| 341221000119109 | Corneal pannus of left eye (disorder)                                                      | Neovascularization      |
| 346471000119103 | Corneal pannus of bilateral eyes (disorder)                                                | Neovascularization      |
| 346481000119100 | Neovascularization of bilateral corneas                                                    | Neovascularization      |
| 346471000119103 | Corneal pannus of bilateral eyes (disorder)                                                | Neovascularization      |
| 335621000119105 | Neovascularization of right cornea (disorder)                                              | Neovascularization      |
| 335611000119103 | Corneal pannus of right eye (disorder)                                                     | Neovascularization      |
| 346471000119103 | Corneal pannus of bilateral eyes (disorder)                                                | Neovascularization      |
| 346481000119100 | Neovascularization of bilateral corneas                                                    | Neovascularization      |

|                   |                                                                                               |                    |
|-------------------|-----------------------------------------------------------------------------------------------|--------------------|
| 346471000119103   | Corneal pannus of bilateral eyes (disorder)                                                   | Neovascularization |
| 418252000         | Salmon patch cornea (disorder)                                                                | Neovascularization |
| 246926002         | Superficial contact lens-induced peripheral corneal vascularization (finding)                 | Neovascularization |
| 231911000         | Superficial corneal vascularization (disorder)                                                | Neovascularization |
| 61267008          | Retinal neovascularization (disorder)                                                         | Neovascularization |
| 314265001         | Classic choroidal neovascular membrane (disorder)                                             | Neovascularization |
| 314267009         | Extramacular choroidal neovascular membrane (disorder)                                        | Neovascularization |
| 314269007         | Idiopathic choroidal neovascular membrane (disorder)                                          | Neovascularization |
| 314266000         | Occult choroidal neovascular membrane (disorder)                                              | Neovascularization |
| 232071006         | Occult neovascularization of macula (disorder)                                                | Neovascularization |
| 163989008         | On examination - retinal vascular proliferation (disorder)                                    | Neovascularization |
| 247099009         | Optic disc neovascularization (disorder)                                                      | Neovascularization |
| 314268004         | Peripapillary choroidal neovascular membrane (disorder)                                       | Neovascularization |
| 247100001         | Peripheral retinal neovascularization (disorder)                                              | Neovascularization |
| 792908009         | Retinal angiomatous proliferation (disorder)                                                  | Neovascularization |
| 16711551000119108 | Retinal neovascularization due to occlusion of branch of retinal vein of left eye (disorder)  | Neovascularization |
| 16711591000119103 | Retinal neovascularization due to occlusion of branch of retinal vein of right eye (disorder) | Neovascularization |
| 16711071000119107 | Retinal neovascularization due to occlusion of central retinal vein of left eye (disorder)    | Neovascularization |
| 16711031000119109 | Retinal neovascularization due to occlusion of central retinal vein of right eye (disorder)   | Neovascularization |
| 251732007         | Neovascularization of angle (finding)                                                         | Neovascularization |
| 232086000         | Neovascular glaucoma (disorder)                                                               | Neovascularization |
| 713457002         | Neovascular glaucoma due to diabetes mellitus (disorder)                                      | Neovascularization |
| 698840003         | Neovascular glaucoma due to hyphema (disorder)                                                | Neovascularization |
| 75971007          | Choroidal retinal neovascularization (disorder)                                               | Neovascularization |
| 314265001         | Classic choroidal neovascular membrane (disorder)                                             | Neovascularization |
| 314267009         | Extramacular choroidal neovascular membrane (disorder)                                        | Neovascularization |
| 314269007         | Idiopathic choroidal neovascular membrane (disorder)                                          | Neovascularization |
| 733124000         | Myopic choroidal neovascularization (disorder)                                                | Neovascularization |
| 677651000119102   | Neovascularization of choroid of left eye (disorder)                                          | Neovascularization |
| 677211000119101   | Histoplasmosis syndrome of left eye (disorder)                                                | Neovascularization |
| 677201000119104   | Histoplasmosis syndrome of bilateral eyes (disorder)                                          | Neovascularization |

|                 |                                                                                                                     |                    |
|-----------------|---------------------------------------------------------------------------------------------------------------------|--------------------|
| 677621000119105 | Neovascularization of choroid of bilateral eyes (disorder)                                                          | Neovascularization |
| 677201000119104 | Histoplasmosis syndrome of bilateral eyes (disorder)                                                                | Neovascularization |
| 677681000119109 | Neovascularization of choroid of right eye (disorder)                                                               | Neovascularization |
| 677221000119108 | Histoplasmosis syndrome of right eye (disorder)                                                                     | Neovascularization |
| 677201000119104 | Histoplasmosis syndrome of bilateral eyes (disorder)                                                                | Neovascularization |
| 677621000119105 | Neovascularization of choroid of bilateral eyes (disorder)                                                          | Neovascularization |
| 677201000119104 | Histoplasmosis syndrome of bilateral eyes (disorder)                                                                | Neovascularization |
| 314266000       | Occult choroidal neovascular membrane (disorder)                                                                    | Neovascularization |
| 416770009       | Ocular histoplasmosis syndrome (disorder)                                                                           | Neovascularization |
| 677211000119101 | Histoplasmosis syndrome of left eye (disorder)                                                                      | Neovascularization |
| 677201000119104 | Histoplasmosis syndrome of bilateral eyes (disorder)                                                                | Neovascularization |
| 677621000119105 | Neovascularization of choroid of bilateral eyes (disorder)                                                          | Neovascularization |
| 677201000119104 | Histoplasmosis syndrome of bilateral eyes (disorder)                                                                | Neovascularization |
| 677221000119108 | Histoplasmosis syndrome of right eye (disorder)                                                                     | Neovascularization |
| 677201000119104 | Histoplasmosis syndrome of bilateral eyes (disorder)                                                                | Neovascularization |
| 677621000119105 | Neovascularization of choroid of bilateral eyes (disorder)                                                          | Neovascularization |
| 677201000119104 | Histoplasmosis syndrome of bilateral eyes (disorder)                                                                | Neovascularization |
| 314268004       | Peripapillary choroidal neovascular membrane (disorder)                                                             | Neovascularization |
| 76309006        | Cataract with neovascularization                                                                                    | Neovascularization |
| 232046008       | Branch retinal vein occlusion with neovascularization (disorder)                                                    | Neovascularization |
| 232038007       | Central retinal vein occlusion with neovascularization (disorder)                                                   | Neovascularization |
| 232044006       | Hemispheric retinal vein occlusion with neovascularization (disorder)                                               | Neovascularization |
| 312909004       | Proliferative retinopathy with iris neovascularization due to diabetes mellitus (disorder)                          | Neovascularization |
| 232041003       | Central retinal vein occlusion - juvenile with neovascularization (disorder)                                        | Neovascularization |
| 232021008       | Proliferative retinopathy with optic disc neovascularization due to diabetes mellitus (disorder)                    | Neovascularization |
| 232022001       | Proliferative retinopathy with neovascularization elsewhere than the optic disc due to diabetes mellitus (disorder) | Neovascularization |
| 770437002       | Fundus pulverulentus (disorder)                                                                                     | Neovascularization |
| 783090002       | Idiopathic retinal vasculitis, aneurysms, neuroretinitis syndrome (disorder)                                        | Neovascularization |
| 773991005       | Idiopathic posterior uveitis (disorder)                                                                             | Neovascularization |
| 723502001       | Reticular dystrophy of retinal pigment epithelium (disorder)                                                        | Neovascularization |
| 719431007       | Autosomal dominant late-onset retinal degeneration (disorder)                                                       | Neovascularization |

|                 |                                                                              |                            |
|-----------------|------------------------------------------------------------------------------|----------------------------|
| 719297006       | Persistent placoid maculopathy (disorder)                                    | Neovascularization         |
| 770791000       | Autosomal dominant neovascular inflammatory vitreoretinopathy (disorder)     | Neovascularization         |
| 31056006        | Orbital hemorrhage (disorder)                                                | Vitreous hemorrhage        |
| 21117005        | Conjunctival hemorrhage (disorder)                                           | Vitreous hemorrhage        |
| 339041000119109 | Hemorrhage of left orbit (disorder)                                          | Vitreous hemorrhage        |
| 333431000119106 | Hemorrhage of right orbit (disorder)                                         | Vitreous hemorrhage        |
| 194179009       | Retrobulbar hemorrhage (disorder)                                            | Vitreous hemorrhage        |
| 733308009       | Traumatic orbital hemorrhage (disorder)                                      | Vitreous hemorrhage        |
| 31341008        | Vitreous hemorrhage (disorder)                                               | Vitreous hemorrhage        |
| 336981000119105 | Hemorrhage of left vitreous body (disorder)                                  | Vitreous hemorrhage        |
| 343091000119103 | Hemorrhage of bilateral vitreous bodies (disorder)                           | Vitreous hemorrhage        |
| 678071000119103 | Preretinal hemorrhage of left eye (disorder)                                 | Vitreous hemorrhage        |
| 770362001       | Vitreous hemorrhage of left eye due to diabetes mellitus (disorder)          | Vitreous hemorrhage        |
| 331371000119103 | Hemorrhage of right vitreous body (disorder)                                 | Vitreous hemorrhage        |
| 343091000119103 | Hemorrhage of bilateral vitreous bodies (disorder)                           | Vitreous hemorrhage        |
| 678091000119102 | Preretinal hemorrhage of right eye (disorder)                                | Vitreous hemorrhage        |
| 770361008       | Vitreous hemorrhage of right eye due to diabetes mellitus (disorder)         | Vitreous hemorrhage        |
| 163990004       | On examination - vitreous hemorrhages (disorder)                             | Vitreous hemorrhage        |
| 312910009       | Vitreous hemorrhage due to diabetes mellitus (disorder)                      | Vitreous hemorrhage        |
| 104951000119106 | Vitreous hemorrhage due to type 1 diabetes mellitus (disorder)               | Vitreous hemorrhage        |
| 1491000119102   | Vitreous hemorrhage due to type 2 diabetes mellitus (disorder)               | Vitreous hemorrhage        |
| 770362001       | Vitreous hemorrhage of left eye due to diabetes mellitus (disorder)          | Vitreous hemorrhage        |
| 770361008       | Vitreous hemorrhage of right eye due to diabetes mellitus (disorder)         | Vitreous hemorrhage        |
| 73757007        | Retinal vascular occlusion (disorder)                                        | Retinal vascular occlusion |
| 68478007        | Central retinal vein occlusion (disorder)                                    | Retinal vascular occlusion |
| 312997008       | Central retinal vein occlusion - ischemic (disorder)                         | Retinal vascular occlusion |
| 232040002       | Central retinal vein occlusion - juvenile (disorder)                         | Retinal vascular occlusion |
| 232042005       | Central retinal vein occlusion - juvenile with macular edema (disorder)      | Retinal vascular occlusion |
| 232041003       | Central retinal vein occlusion - juvenile with neovascularization (disorder) | Retinal vascular occlusion |
| 312998003       | Central retinal vein occlusion - non-ischemic (disorder)                     | Retinal vascular occlusion |
| 232039004       | Central retinal vein occlusion with macular edema (disorder)                 | Retinal vascular occlusion |

|           |                                                                                        |                            |
|-----------|----------------------------------------------------------------------------------------|----------------------------|
| 232038007 | Central retinal vein occlusion with neovascularization (disorder)                      | Retinal vascular occlusion |
| 232043000 | Hemispheric retinal vein occlusion (disorder)                                          | Retinal vascular occlusion |
| 232045007 | Hemispheric retinal vein occlusion with macular edema (disorder)                       | Retinal vascular occlusion |
| 232044006 | Hemispheric retinal vein occlusion with neovascularization (disorder)                  | Retinal vascular occlusion |
| 733325006 | Combined occlusion by thrombus of retinal artery and retinal vein (disorder)           | Retinal vascular occlusion |
| 193379006 | Retinal venous engorgement (disorder)                                                  | Retinal vascular occlusion |
| 24596005  | Venous retinal branch occlusion (disorder)                                             | Retinal vascular occlusion |
| 232048009 | Branch retinal vein occlusion with macular edema (disorder)                            | Retinal vascular occlusion |
| 232046008 | Branch retinal vein occlusion with neovascularization (disorder)                       | Retinal vascular occlusion |
| 314000002 | Branch retinal vein occlusion with no neovascularization (disorder)                    | Retinal vascular occlusion |
| 232068003 | Retinal pigment epithelial detachment with vascularization (disorder)                  | Retinal vascular occlusion |
| 420308006 | Retinal vascular changes associated with acquired immunodeficiency syndrome (disorder) | Retinal vascular occlusion |
| 46085004  | Retinal vein occlusion                                                                 | Retinal vein occlusion     |
| 68478007  | Central retinal vein occlusion (disorder)                                              | Retinal vein occlusion     |
| 312997008 | Central retinal vein occlusion - ischemic (disorder)                                   | Retinal vein occlusion     |
| 232040002 | Central retinal vein occlusion - juvenile (disorder)                                   | Retinal vein occlusion     |
| 232042005 | Central retinal vein occlusion - juvenile with macular edema (disorder)                | Retinal vein occlusion     |
| 232041003 | Central retinal vein occlusion - juvenile with neovascularization (disorder)           | Retinal vein occlusion     |
| 312998003 | Central retinal vein occlusion - non-ischemic (disorder)                               | Retinal vein occlusion     |
| 232039004 | Central retinal vein occlusion with macular edema (disorder)                           | Retinal vein occlusion     |
| 232038007 | Central retinal vein occlusion with neovascularization (disorder)                      | Retinal vein occlusion     |
| 232043000 | Hemispheric retinal vein occlusion (disorder)                                          | Retinal vein occlusion     |
| 232045007 | Hemispheric retinal vein occlusion with macular edema (disorder)                       | Retinal vein occlusion     |
| 232044006 | Hemispheric retinal vein occlusion with neovascularization (disorder)                  | Retinal vein occlusion     |
| 733325006 | Combined occlusion by thrombus of retinal artery and retinal vein (disorder)           | Retinal vein occlusion     |
| 71719003  | Thrombophlebitis of retinal vein (disorder)                                            | Retinal vein occlusion     |
| 24596005  | Venous retinal branch occlusion (disorder)                                             | Retinal vein occlusion     |
| 232048009 | Branch retinal vein occlusion with macular edema (disorder)                            | Retinal vein occlusion     |
| 232046008 | Branch retinal vein occlusion with neovascularization (disorder)                       | Retinal vein occlusion     |
| 314000002 | Branch retinal vein occlusion with no neovascularization (disorder)                    | Retinal vein occlusion     |
| 65593009  | Partial occlusion of retinal vein (disorder)                                           | Retinal vein occlusion     |



|                 |                                                                    |                          |
|-----------------|--------------------------------------------------------------------|--------------------------|
| 677821000119109 | Partial occlusion of left retinal vein (disorder)                  | Retinal vein occlusion   |
| 677831000119107 | Partial occlusion of right retinal vein (disorder)                 | Retinal vein occlusion   |
| 28578008        | Incipient occlusion of retinal vein (disorder)                     | Retinal vein occlusion   |
| 247121001       | Macular branch retinal vein occlusion (disorder)                   | Retinal vein occlusion   |
| 427902001       | History of branch retinal vein occlusion (situation)               | Retinal vein occlusion   |
| 432006000       | History of occlusion of central retinal vein (situation)           | Retinal vein occlusion   |
| 42059000        | Retinal detachment (disorder)                                      | Retinal detachment       |
| 232012007       | Combined traction and rhegmatogenous retinal detachment (disorder) | Retinal detachment       |
| 713345005       | Partial retinal detachment (disorder)                              | Retinal detachment       |
| 314494006       | Pseudophakic retinal detachment (disorder)                         | Retinal detachment       |
| 56202001        | Retinal detachment with retinal defect (disorder)                  | Retinal detachment       |
| 51987004        | Retinal detachment without retinal defect (disorder)               | Retinal detachment       |
| 19620000        | Rhegmatogenous retinal detachment (disorder)                       | Retinal detachment       |
| 331111000119108 | Total retinal detachment (disorder)                                | Retinal detachment       |
| 34711008        | Traction detachment of retina (disorder)                           | Retinal detachment       |
| 50821009        | Arterial retinal branch occlusion (disorder)                       | Retinal vascular disease |
| 312937006       | Cavernous hemangioma of retina (disorder)                          | Retinal vascular disease |
| 232036006       | Cilioretinal artery occlusion (disorder)                           | Retinal vascular disease |
| 789700005       | Congenital racemose hemangioma of retina (disorder)                | Retinal vascular disease |
| 28578008        | Incipient occlusion of retinal vein (disorder)                     | Retinal vascular disease |
| 247121001       | Macular branch retinal vein occlusion (disorder)                   | Retinal vascular disease |
| 786049007       | Occlusion of branch of retinal vein of left eye (disorder)         | Retinal vascular disease |
| 786050007       | Occlusion of branch of retinal vein of right eye (disorder)        | Retinal vascular disease |
| 786055002       | Occlusion of central retinal vein of left eye (disorder)           | Retinal vascular disease |
| 786054003       | Occlusion of central retinal vein of right eye (disorder)          | Retinal vascular disease |
| 776009          | Partial occlusion of retinal artery (disorder)                     | Retinal vascular disease |
| 65593009        | Partial occlusion of retinal vein (disorder)                       | Retinal vascular disease |
| 95501007        | Retinal arteriovenous malformation (disorder)                      | Retinal vascular disease |
| 232035005       | Retinal artery occlusion (disorder)                                | Retinal vascular disease |
| 64959007        | Retinal artery spasm (disorder)                                    | Retinal vascular disease |
| 404667009       | Retinal embolus (disorder)                                         | Retinal vascular disease |

|           |                                                                                               |                              |
|-----------|-----------------------------------------------------------------------------------------------|------------------------------|
| 76975009  | Retinal microembolism (disorder)                                                              | Retinal vascular disease     |
| 61267008  | Retinal neovascularization (disorder)                                                         | Retinal vascular disease     |
| 84884003  | Retinal telangiectasia (disorder)                                                             | Retinal vascular disease     |
| 420308006 | Retinal vascular changes associated with acquired immunodeficiency syndrome (disorder)        | Retinal vascular disease     |
| 73757007  | Retinal vascular occlusion (disorder)                                                         | Retinal vascular disease     |
| 77628002  | Retinal vasculitis (disorder)                                                                 | Retinal vascular disease     |
| 783787000 | Retinal vasculopathy with cerebral leukoencephalopathy and systemic manifestations (disorder) | Retinal vascular disease     |
| 429397000 | Rouleaux formation in retinal artery (disorder)                                               | Retinal vascular disease     |
| 3506008   | Stenosis of retinal artery (disorder)                                                         | Retinal vascular disease     |
| 26214006  | Thrombosis of retinal artery (disorder)                                                       | Retinal vascular disease     |
| 46085004  | Thrombosis of retinal vein (disorder)                                                         | Retinal vascular disease     |
| 87224000  | Transient arterial retinal occlusion (disorder)                                               | Retinal vascular disease     |
| 52539004  | Vascular sheathing of retina (disorder)                                                       | Retinal vascular disease     |
| 771235001 | Vasoproliferative tumor of retina (disorder)                                                  | Retinal vascular disease     |
| 359957005 | Photocoagulation of eye (procedure)                                                           | Laser and steroid procedures |
| 49257005  | Destruction of chorioretinal lesion by laser photocoagulation (procedure)                     | Laser and steroid procedures |
| 64943007  | Destruction of lesion of choroid by photocoagulation (procedure)                              | Laser and steroid procedures |
| 420029005 | Endolaser photocoagulation (procedure)                                                        | Laser and steroid procedures |
| 398874009 | Focal photocoagulation (procedure)                                                            | Laser and steroid procedures |
| 398750002 | Grid photocoagulation (procedure)                                                             | Laser and steroid procedures |
| 35137007  | Photocoagulation of ciliary body (procedure)                                                  | Laser and steroid procedures |
| 76458006  | Photocoagulation of iris (procedure)                                                          | Laser and steroid procedures |
| 231762005 | Photocoagulation to retina (procedure)                                                        | Laser and steroid procedures |
| 81924001  | Destruction of lesion of retina by photocoagulation (procedure)                               | Laser and steroid procedures |
| 399867007 | Laser photocoagulation to retina (procedure)                                                  | Laser and steroid procedures |
| 312713003 | Panretinal photocoagulation (procedure)                                                       | Laser and steroid procedures |
| 172586003 | Panretinal photocoagulation for glaucoma (procedure)                                          | Laser and steroid procedures |
| 413180006 | Pan retinal photocoagulation for diabetes (procedure)                                         | Laser and steroid procedures |
| 440578004 | Photocoagulation of macular drusen (procedure)                                                | Laser and steroid procedures |
| 78917001  | Repair of retina for retinal detachment by photocoagulation (procedure)                       | Laser and steroid procedures |
| 66208000  | Repair of retina for retinal tear or defect by photocoagulation (procedure)                   | Laser and steroid procedures |

---

|           |                                                                |                              |
|-----------|----------------------------------------------------------------|------------------------------|
| 398952004 | Sectoral photocoagulation (procedure)                          | Laser and steroid procedures |
| 425431007 | Injection of steroid into posterior segment of eye (procedure) | Laser and steroid procedures |
| 410572008 | Intravitreal steroid injection (procedure)                     | Laser and steroid procedures |

---

**eTable 4. Diagnosis Codes Used for Identification of PDR and PDR-Related Events From the IBM Explorys™ Database**

| SNOMED ID      | Description                                                                                                           | Clinical Classification |
|----------------|-----------------------------------------------------------------------------------------------------------------------|-------------------------|
| 59276001       | Proliferative retinopathy due to diabetes mellitus (disorder)                                                         | PDR                     |
| 232021008      | Proliferative retinopathy with optic disc neovascularization due to diabetes mellitus (disorder)                      | PDR                     |
| 232022001      | Proliferative retinopathy with neovascularization elsewhere than the optic disc due to diabetes mellitus (disorder)   | PDR                     |
| 312906006      | Non-high-risk proliferative retinopathy due to diabetes mellitus (disorder)                                           | PDR                     |
| 312907002      | High risk proliferative retinopathy due to diabetes mellitus (disorder)                                               | PDR                     |
| 312908007      | Quiescent proliferative retinopathy due to diabetes mellitus (disorder)                                               | PDR                     |
| 312909004      | Proliferative retinopathy with iris neovascularization due to diabetes mellitus (disorder)                            | PDR                     |
| 399862001      | High risk proliferative retinopathy without macular edema due to diabetes mellitus (disorder)                         | PDR                     |
| 399865004      | Very severe proliferative retinopathy due to diabetes mellitus (disorder)                                             | PDR                     |
| 399869005      | High risk proliferative retinopathy not amenable to photocoagulation due to diabetes mellitus                         | PDR                     |
| 399870006      | Non-high-risk proliferative retinopathy with no macular edema due to diabetes mellitus (disorder)                     | PDR                     |
| 399871005      | Visually threatening retinopathy due to diabetes mellitus (disorder)                                                  | PDR                     |
| 399874002      | High risk proliferative retinopathy with clinically significant macula edema due to diabetes mellitus (disorder)      | PDR                     |
| 399875001      | Non-high-risk proliferative retinopathy with clinically significant macular edema due to diabetes mellitus (disorder) | PDR                     |
| 408413000      | On examination - right eye proliferative diabetic retinopathy (disorder)                                              | PDR                     |
| 408414006      | On examination - left eye proliferative diabetic retinopathy (disorder)                                               | PDR                     |
| 414894003      | On examination - left eye stable treated proliferative diabetic retinopathy (disorder)                                | PDR                     |
| 414910007      | On examination - right eye stable treated proliferative diabetic retinopathy (disorder)                               | PDR                     |
| 417677008      | On examination - sight threatening diabetic retinopathy (disorder)                                                    | PDR                     |
| 770765001      | Proliferative retinopathy of right eye due to diabetes mellitus (disorder)                                            | PDR                     |
| 770766000      | Proliferative retinopathy of left eye due to diabetes mellitus (disorder)                                             | PDR                     |
| 816961009      | Stable treated proliferative retinopathy of right eye due to diabetes mellitus (disorder)                             | PDR                     |
| 816962002      | Stable treated proliferative retinopathy of left eye due to diabetes mellitus (disorder)                              | PDR                     |
| 1501000119109  | Proliferative retinopathy due to type 2 diabetes mellitus (disorder)                                                  | PDR                     |
| 60971000119101 | Proliferative retinopathy due to type 1 diabetes mellitus (disorder)                                                  | PDR                     |
| 60971000119101 | Proliferative diabetic retinopathy due to type 1 diabetes mellitus (disorder)                                         | PDR                     |

|                 |                                                                                            |                     |
|-----------------|--------------------------------------------------------------------------------------------|---------------------|
| 97341000119105  | Proliferative retinopathy with retinal edema due to type 2 diabetes mellitus (disorder)    | PDR                 |
| 103981000119101 | Proliferative retinopathy following surgery due to diabetes mellitus (disorder)            | PDR                 |
| 251732007       | Neovascularization of angle (finding)                                                      | Neovascularization  |
| 232086000       | Neovascular glaucoma (disorder)                                                            | Neovascularization  |
| 713457002       | Neovascular glaucoma due to diabetes mellitus (disorder)                                   | Neovascularization  |
| 698840003       | Neovascular glaucoma due to hyphema (disorder)                                             | Neovascularization  |
| 247100001       | Peripheral retinal neovascularization (disorder)                                           | Neovascularization  |
| 163989008       | On examination - retinal vascular proliferation (disorder)                                 | Neovascularization  |
| 247099009       | Optic disc neovascularization (disorder)                                                   | Neovascularization  |
| 61267008        | Retinal neovascularization                                                                 | Neovascularization  |
| 51995000        | Iris neovascularization                                                                    | Neovascularization  |
| 713457002       | Neovascular glaucoma due to diabetes mellitus (disorder)                                   | Neovascularization  |
| 416328002       | On examination - Left eye rubeosis iridis (disorder)                                       | Neovascularization  |
| 416650005       | On examination - Right eye rubeosis iridis (disorder)                                      | Neovascularization  |
| 312909004       | Proliferative retinopathy with iris neovascularization due to diabetes mellitus (disorder) | Neovascularization  |
| 82581000119105  | Rubeosis iridis due to type 1 diabetes mellitus (disorder)                                 | Neovascularization  |
| 82551000119103  | Rubeosis iridis due to type 2 diabetes mellitus (disorder)                                 | Neovascularization  |
| 678201000119103 | Rubeosis iridis of left eye (disorder)                                                     | Neovascularization  |
| 678191000119101 | Rubeosis iridis of bilateral eyes (disorder)                                               | Neovascularization  |
| 678211000119100 | Rubeosis iridis of right eye (disorder)                                                    | Neovascularization  |
| 31056006        | Orbital hemorrhage (disorder)                                                              | Vitreous hemorrhage |
| 21117005        | Conjunctival hemorrhage (disorder)                                                         | Vitreous hemorrhage |
| 339041000119109 | Hemorrhage of left orbit (disorder)                                                        | Vitreous hemorrhage |
| 333431000119106 | Hemorrhage of right orbit (disorder)                                                       | Vitreous hemorrhage |
| 194179009       | Retrobulbar hemorrhage (disorder)                                                          | Vitreous hemorrhage |
| 733308009       | Traumatic orbital hemorrhage (disorder)                                                    | Vitreous hemorrhage |
| 31341008        | Vitreous hemorrhage (disorder)                                                             | Vitreous hemorrhage |
| 336981000119105 | Hemorrhage of left vitreous body (disorder)                                                | Vitreous hemorrhage |
| 343091000119103 | Hemorrhage of bilateral vitreous bodies (disorder)                                         | Vitreous hemorrhage |
| 678071000119103 | Preretinal hemorrhage of left eye (disorder)                                               | Vitreous hemorrhage |
| 770362001       | Vitreous hemorrhage of left eye due to diabetes mellitus (disorder)                        | Vitreous hemorrhage |

|                 |                                                                      |                     |
|-----------------|----------------------------------------------------------------------|---------------------|
| 331371000119103 | Hemorrhage of right vitreous body (disorder)                         | Vitreous hemorrhage |
| 343091000119103 | Hemorrhage of bilateral vitreous bodies (disorder)                   | Vitreous hemorrhage |
| 678091000119102 | Preretinal hemorrhage of right eye (disorder)                        | Vitreous hemorrhage |
| 770361008       | Vitreous hemorrhage of right eye due to diabetes mellitus (disorder) | Vitreous hemorrhage |
| 163990004       | On examination - vitreous hemorrhages (disorder)                     | Vitreous hemorrhage |
| 312910009       | Vitreous hemorrhage due to diabetes mellitus (disorder)              | Vitreous hemorrhage |
| 104951000119106 | Vitreous hemorrhage due to type 1 diabetes mellitus (disorder)       | Vitreous hemorrhage |
| 1491000119102   | Vitreous hemorrhage due to type 2 diabetes mellitus (disorder)       | Vitreous hemorrhage |
| 770362001       | Vitreous hemorrhage of left eye due to diabetes mellitus (disorder)  | Vitreous hemorrhage |
| 770361008       | Vitreous hemorrhage of right eye due to diabetes mellitus (disorder) | Vitreous hemorrhage |
| 42059000        | Retinal detachment (disorder)                                        | Retinal detachment  |
| 232012007       | Combined traction and rhegmatogenous retinal detachment (disorder)   | Retinal detachment  |
| 713345005       | Partial retinal detachment (disorder)                                | Retinal detachment  |
| 314494006       | Pseudophakic retinal detachment (disorder)                           | Retinal detachment  |
| 31191000119102  | Recent retinal detachment (disorder)                                 | Retinal detachment  |
| 56202001        | Retinal detachment with retinal defect (disorder)                    | Retinal detachment  |
| 51987004        | Retinal detachment without retinal defect (disorder)                 | Retinal detachment  |
| 19620000        | Rhegmatogenous retinal detachment (disorder)                         | Retinal detachment  |
| 331111000119108 | Total retinal detachment (disorder)                                  | Retinal detachment  |
| 34711008        | Traction detachment of retina (disorder)                             | Retinal detachment  |

Abbreviations: PDR, proliferative diabetic retinopathy.

**eTable 5. Effect of Anti-VEGF Therapies on Progression to PDR in Patients With DRSS of 47 and 53 and Moderately Severe or Severe NPDR Over a Period of 12 Months**

| Clinical Trial          | Treatment                               | Patients Achieving a $\geq 2$ -Step DRSS Improvement at 12 Months, % (95% CI) | Progression to PDR at 12 Months, % |
|-------------------------|-----------------------------------------|-------------------------------------------------------------------------------|------------------------------------|
| PANORAMA <sup>8,a</sup> | Intravitreal aflibercept 2q8            | 79.9 (73.1-86.7)                                                              | 0.7                                |
| RISE/RIDE <sup>9</sup>  | Intravitreal ranibizumab 0.3 mg monthly | 76.1 (67.9-84.3)                                                              | 0.0                                |

Abbreviations: 2q8, 2 mg every 8 weeks; CI, confidence interval; DRSS, Diabetic Retinopathy Severity Scale; NPDR, non-proliferative diabetic retinopathy; PDR, proliferative diabetic retinopathy; VEGF, vascular endothelial growth factor.

<sup>a</sup>PANORAMA estimates are calculated as last observation carried forward.

**eTable 6. Baseline Factors Associated With PDR Progression Estimated Using a Cox Proportional Hazards Model**

| Variable                         | $\beta$ Coefficient <sup>a</sup> | Hazard Ratio | P Value |
|----------------------------------|----------------------------------|--------------|---------|
| Age, years                       |                                  |              |         |
| 18-34 (reference)                |                                  |              |         |
| 35-44                            | -0.11                            | 0.89         | .1      |
| 45-54                            | -0.13                            | 0.88         | .04     |
| 55-64                            | -0.22                            | 0.8          | <.005   |
| 65-74                            | -0.32                            | 0.73         | <.005   |
| ≥75                              | -0.46                            | 0.63         | <.005   |
| Sex                              |                                  |              |         |
| Female (reference)               |                                  |              |         |
| Male                             | -0.07                            | 0.93         | <.005   |
| Diabetes type                    |                                  |              |         |
| Type 2 diabetes (reference)      |                                  |              |         |
| Type 1 diabetes                  | 0.12                             | 1.13         | <.005   |
| NPDR severity                    |                                  |              |         |
| Mild (reference)                 |                                  |              |         |
| Moderate                         | 0.67                             | 1.95         | <.005   |
| Severe                           | 1.29                             | 3.62         | <.005   |
| NPDR severity and DME status     |                                  |              |         |
| Mild NPDR and no DME (reference) |                                  |              |         |
| Moderate NPDR and DME            | -0.53                            | 0.59         | .01     |
| Severe NPDR and DME              | -0.89                            | 0.41         | .01     |
| Comorbid conditions (yes vs no)  |                                  |              |         |
| Amputation                       | -0.18                            | 0.83         | <.005   |
| Cerebrovascular accident         | -0.75                            | 0.47         | <.005   |



|                                                        |       |        |       |
|--------------------------------------------------------|-------|--------|-------|
| Diabetic nephropathy                                   | 0.21  | 1.23   | <.005 |
| Diabetic neuropathy                                    | 0.16  | 1.17   | <.005 |
| DME                                                    | 0.85  | 2.34   | <.005 |
| Hypertension                                           | -0.1  | 0.91   | <.005 |
| Lower-extremity ulcer                                  | 0.26  | 1.29   | <.005 |
| Medication use (yes vs no)                             |       |        |       |
| Beta blockers                                          | 0.10  | 1.11   | <.005 |
| Calcium channel blockers                               | 0.07  | 1.08   | .03   |
| Blood glucose management                               | -0.31 | 0.73   | <.005 |
| Insulin                                                | 0.17  | 1.18   | <.005 |
| Laboratory measurements                                |       |        |       |
| Hypertriglyceridemia<br>(>150 mg/dL vs ≤150 mg/dL)     | -0.12 | 0.8989 | <.005 |
| Dyslipidemia in LDL-C<br>(>100 mg/dL vs ≤100 mg/dL)    | 0.05  | 1.06   | .09   |
| No HbA1c measurement (vs<br>HbA1c measurement present) | 0.62  | 1.87   | <.005 |
| HbA1c <sup>b</sup> (%)                                 | 0.09  | 1.09   | <.005 |

Abbreviations: DME, diabetic macular edema; HbA1c, glycated hemoglobin A1c; LDL-C, low-density lipoprotein cholesterol; NPDR, non-proliferative diabetic retinopathy; PDR, proliferative diabetic retinopathy.

<sup>a</sup>A positive  $\beta$  coefficient indicates an increase in risk of PDR progression.

<sup>b</sup>Continuous variable.

**eTable 7. Baseline Demographic and Disease Characteristics**

| Characteristic               | Real-World Cohort<br>(n=77,454) | Simulated Cohort<br>(n=2,000,000) |
|------------------------------|---------------------------------|-----------------------------------|
| Age, years, no. (%)          |                                 |                                   |
| 18-24                        | 351 (0.5)                       | 5613 (0.3)                        |
| 25-34                        | 1886 (2.4)                      | 35,116 (1.8)                      |
| 35-44                        | 4808 (6.2)                      | 90,404 (4.5)                      |
| 45-54                        | 11,458 (14.8)                   | 261,829 (13.1)                    |
| 55-64                        | 19,976 (25.8)                   | 484,804 (24.2)                    |
| 65-74                        | 22,286 (28.8)                   | 647,357 (32.4)                    |
| ≥75                          | 16,689 (21.5)                   | 474,877 (23.7)                    |
| Male, no. (%)                | 38,218 (49.3)                   | 1,072,439 (53.6)                  |
| NPDR severity, no. (%)       |                                 |                                   |
| Mild                         | 71,827 (92.7)                   | 1,550,658 (77.5)                  |
| Moderate                     | 4453 (5.7)                      | 362,662 (18.1)                    |
| Severe                       | 1174 (1.5)                      | 86,680 (4.3)                      |
| Comorbid conditions, no. (%) |                                 |                                   |
| Type 1 diabetes              | 6194 (8.0)                      | 133,262 (6.7)                     |
| Type 2 diabetes              | 71,260 (92.0)                   | 1,866,738 (93.3)                  |
| Hypertension                 | 47,075 (60.8)                   | 1,195,855 (59.8)                  |
| DME                          | 759 (1.0)                       | 460,160 (23.0)                    |
| Diabetic neuropathy          | 10,414 (13.4)                   | 254,512 (12.7)                    |
| Diabetic nephropathy         | 9828 (12.7)                     | 252,776 (12.6)                    |
| Cataract                     | 5117 (6.6)                      | 214,914 (10.7)                    |
| Lower-extremity ulcer        | 4590 (5.9)                      | 119,728 (6.0)                     |
| Myocardial infarction        | 4573 (5.9)                      | 110,480 (5.5)                     |
| Amputation                   | 4298 (5.5)                      | 100,868 (5.0)                     |

|                          |               |                |
|--------------------------|---------------|----------------|
| Hemiplegia               | 865 (1.1)     | 18,480 (0.9)   |
| Cerebrovascular accident | 321 (0.4)     | 7146 (0.4)     |
| Medication use, no. (%)  |               |                |
| Lipid-modifying agent    | 28,385 (36.6) | 697,714 (34.9) |
| Insulin                  | 25,813 (33.3) | 633,270 (31.7) |
| Blood glucose management | 24,251 (31.3) | 613,948 (30.7) |
| ACEi                     | 20,128 (26.0) | 513,328 (25.7) |
| Beta blockers            | 19,689 (25.4) | 500,382 (25.0) |
| Diuretics                | 19,803 (25.6) | 493,868 (24.7) |
| Calcium channel blockers | 12,985 (16.8) | 328,402 (16.4) |

Abbreviations: ACEi, angiotensin-converting enzyme inhibitors; DME, diabetic macular edema; NPDR, non-proliferative diabetic retinopathy.

**eTable 8. Absolute Risk Reduction in PDR Events Projected From Year 1 Clinical Trial Data Over 5 Years Based on Anti-VEGF Treatment Scenario**

|                                               | N                | No. of PDR events (%) |                 |                      | Absolute Risk Reduction, % | Number Needed to Treat, % |
|-----------------------------------------------|------------------|-----------------------|-----------------|----------------------|----------------------------|---------------------------|
|                                               |                  | Before Treatment      | After Treatment | Avoided              |                            |                           |
| <b>PANORAMA Treatment Scenario</b>            |                  |                       |                 |                      |                            |                           |
| Diabetes status                               |                  |                       |                 |                      |                            |                           |
| Type 1 diabetes                               | 133,262          | 24,734                | 22,814          | 1920 (7.8)           | 1.4                        | 69.41                     |
| Type 2 diabetes                               | 1,866,738        | 275,298               | 246,638         | 28,660 (10.4)        | 1.5                        | 65.13                     |
| NPDR severity                                 |                  |                       |                 |                      |                            |                           |
| Mild                                          | 1,550,658        | 184,026               | 181,863         | 2163 (1.2)           | 0.1                        | 716.90                    |
| Moderate                                      | 362,663          | 83,527                | 71,809          | 11,718 (14.0)        | 3.2                        | 30.95                     |
| Severe                                        | 86,679           | 32,479                | 15,780          | 16,699 (51.4)        | 19.3                       | 5.19                      |
| <b>Total</b>                                  | <b>2,000,000</b> | <b>300,032</b>        | <b>269,452</b>  | <b>30,580 (10.2)</b> | <b>1.5</b>                 | <b>65.40</b>              |
| <b>RISE/RIDE Treatment Scenario</b>           |                  |                       |                 |                      |                            |                           |
| Type 1 diabetes                               | 133,329          | 24,729                | 22,792          | 1937 (7.8)           | 1.5                        | 68.83                     |
| Type 2 diabetes                               | 1,866,671        | 275,382               | 246,201         | 29,181 (10.6)        | 1.6                        | 63.97                     |
| Mild NPDR                                     | 1,550,422        | 184,004               | 181,749         | 2255 (1.2)           | 0.1                        | 687.55                    |
| Moderate NPDR                                 | 362,912          | 83,613                | 71,588          | 12,025 (14.4)        | 3.3                        | 30.18                     |
| Severe NPDR                                   | 86,666           | 32,494                | 15,656          | 16,838 (51.8)        | 19.4                       | 5.15                      |
| <b>Total</b>                                  | <b>2,000,000</b> | <b>300,111</b>        | <b>268,993</b>  | <b>31,118 (10.4)</b> | <b>1.6</b>                 | <b>64.27</b>              |
| <b>Composite Anti-VEGF Treatment Scenario</b> |                  |                       |                 |                      |                            |                           |
| Type 1 diabetes                               | 133,303          | 24,731                | 22,801          | 1930 (7.8)           | 1.4                        | 69.06                     |

---

|                 |                  |                |                |                          |            |              |
|-----------------|------------------|----------------|----------------|--------------------------|------------|--------------|
| Type 2 diabetes | 1,866,697        | 275,349        | 246,371        | 28,978<br>(10.5)         | 1.6        | 64.42        |
| Mild NPDR       | 1,550,514        | 184,013        | 181,793        | 2219 (1.2)               | 0.1        | 698.71       |
| Moderate NPDR   | 362,815          | 83,579         | 71,674         | 11,905<br>(14.2)         | 3.3        | 30.48        |
| Severe NPDR     | 86,671           | 32,488         | 15,704         | 16,784<br>(51.7)         | 19.4       | 5.16         |
| <b>Total</b>    | <b>2,000,000</b> | <b>300,080</b> | <b>269,172</b> | <b>30,908<br/>(10.3)</b> | <b>1.5</b> | <b>64.71</b> |

---

Abbreviations: NPDR, non-proliferative diabetic retinopathy; PDR, proliferative diabetic retinopathy; VEGF, vascular endothelial growth factor.

**eFigure 1. Selection of Treatment-Naive Patients With NPDR From the IBM Explorys™ Database**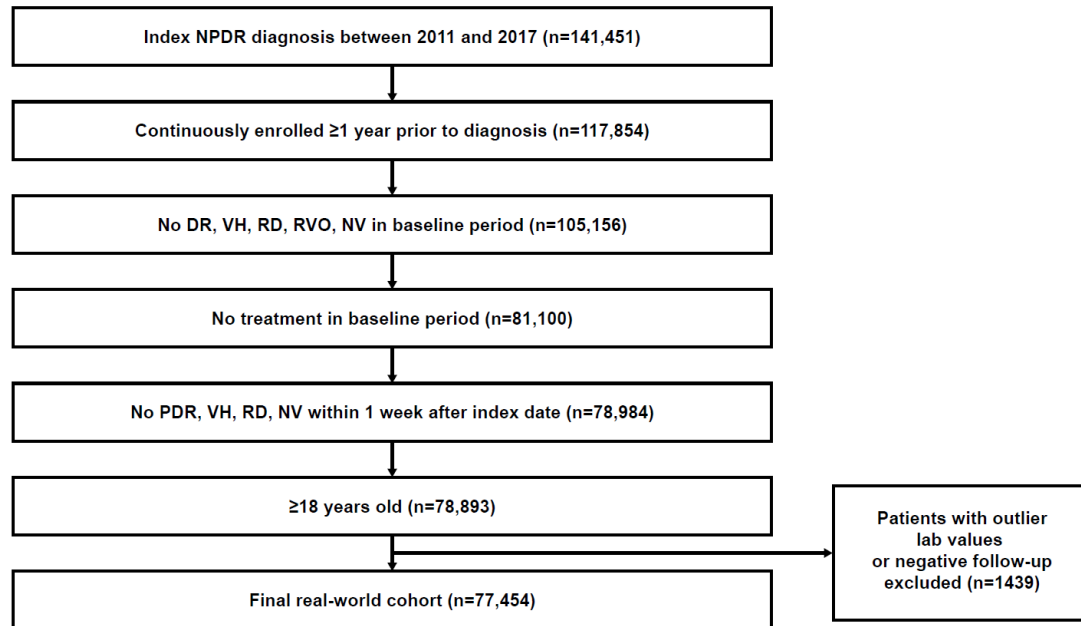

Abbreviations: NPDR, non-proliferative diabetic retinopathy; NV, neovascularization; PDR, proliferative diabetic retinopathy; RD, retinal detachment; RVO, retinal vein occlusion; VH, vitreous hemorrhage.

**eFigure 2. (A) Five-Year Cumulative Rate of Disease Progression in Untreated Patients From the Real-World Cohort and (B) Impact of Intravitreal Aflibercept on the Rate of Disease Progression in Patients With Moderate to Severe NPDR From the PANORAMA Trial Projected Over 5 Years<sup>a</sup>**

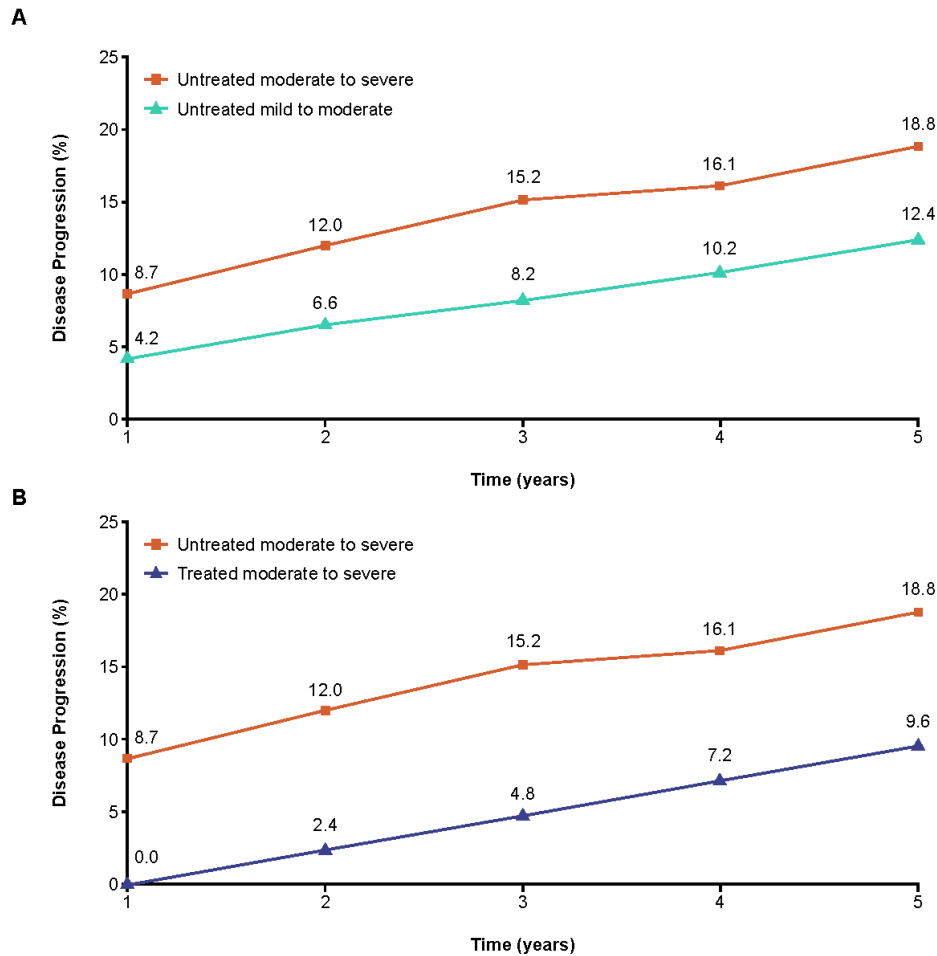

Abbreviations: 2q8, 2 mg every 8 weeks; NPDR, non-proliferative diabetic retinopathy.

<sup>a</sup>Treated patients with moderate NPDR are the patients with severe NPDR who experienced  $\geq 2$ -step improvement after treatment. For the treated population, data for years 1 and 2 are based on the PANORAMA trial and for years 3-5 are based on a linear projection of disease progression as observed in the intravitreal aflibercept 2q8 arm at week 100.

**eFigure 3. Treatment Effect Variability on the Risk of PDR Progression Among Patients With Severe NPDR**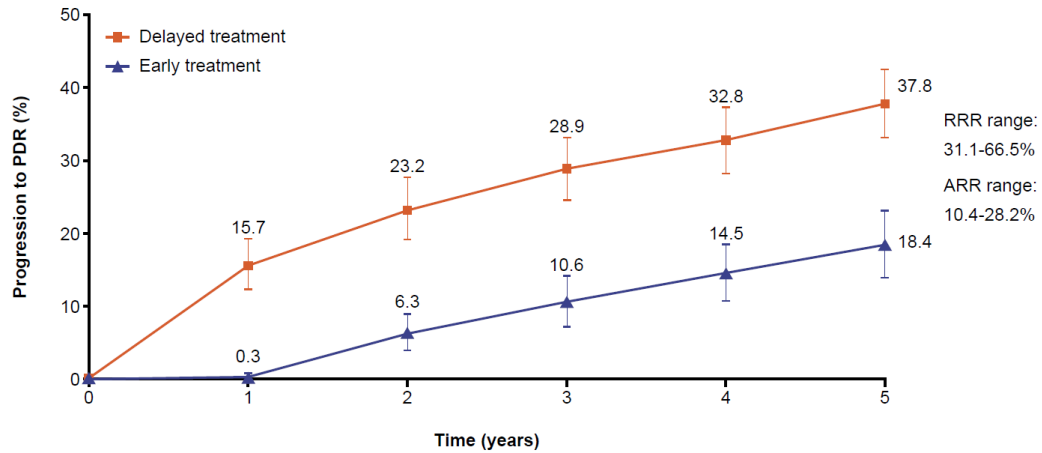

Abbreviations: ARR, absolute risk reduction; NPDR, non-proliferative diabetic retinopathy; PDR, proliferative diabetic retinopathy; RRR, relative risk reduction.

Error bars represent 95% confidence intervals. Margin of error within  $\pm 5\%$  for each simulation year.



**eFigure 4. Impact of Early Versus Delayed Anti-VEGF Treatment on the Estimated Incidence of Blindness<sup>a</sup> Over a 10-Year Period**

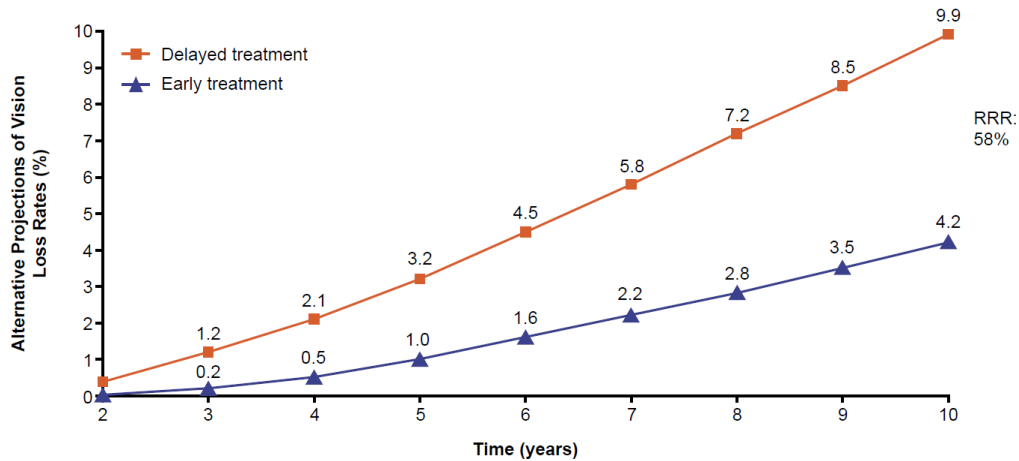

Abbreviations: DRS, Diabetic Retinopathy Study; NPDR, non-proliferative diabetic retinopathy; RRR, relative risk reduction; VEGF, vascular endothelial growth factor.

<sup>a</sup>Estimated based on a linear projection of the DRS.<sup>12</sup>
